# Supplementary material for: Growth dynamics of surface nanodroplets during solvent exchange at varying flow rates
Source: Royal Society of Chemistry journal article supplement (doi:10.1039/c8sm00705e), 2018-01-01
Supplement: c8sm00705e1.pdf [file c8sm00705e1.pdf]

## Supporting Information

# **Growth dynamics of surface nanodroplets during solvent exchange at varying flow rates**

Brendan Dyett,<sup>a</sup> Akihito Kiyama,<sup>b</sup> Maaïke Rump,<sup>c</sup> Yoshiyuki Tagawa<sup>b</sup> Detlef Lohse<sup>c</sup> and  
Xuehua Zhang<sup>dac</sup>

*<sup>a</sup>Soft Matter & Interfaces Group, School of Engineering, RMIT University, Melbourne,  
VIC 3001*

*<sup>b</sup>Department of Mechanical Systems Engineering, Tokyo University of Agriculture and  
Technology, Nakacho 2-24-16 Koganei, Tokyo 184-8588, Japan.*

*<sup>c</sup>Physics of Fluids group, Department of Science and Engineering, MESA+ Institute, J. M.  
Burgers Centre for Fluid Dynamics and the Max Planck Twente Center for Complex Fluid  
Dynamics, University of Twente, P.O. Box 217, 7500 AE Enschede, The Netherlands*

*<sup>d</sup>Department of Chemical and Materials Engineering, Faculty of Engineering, University of  
Alberta, Edmonton, Alberta T6G1H9, Canada*

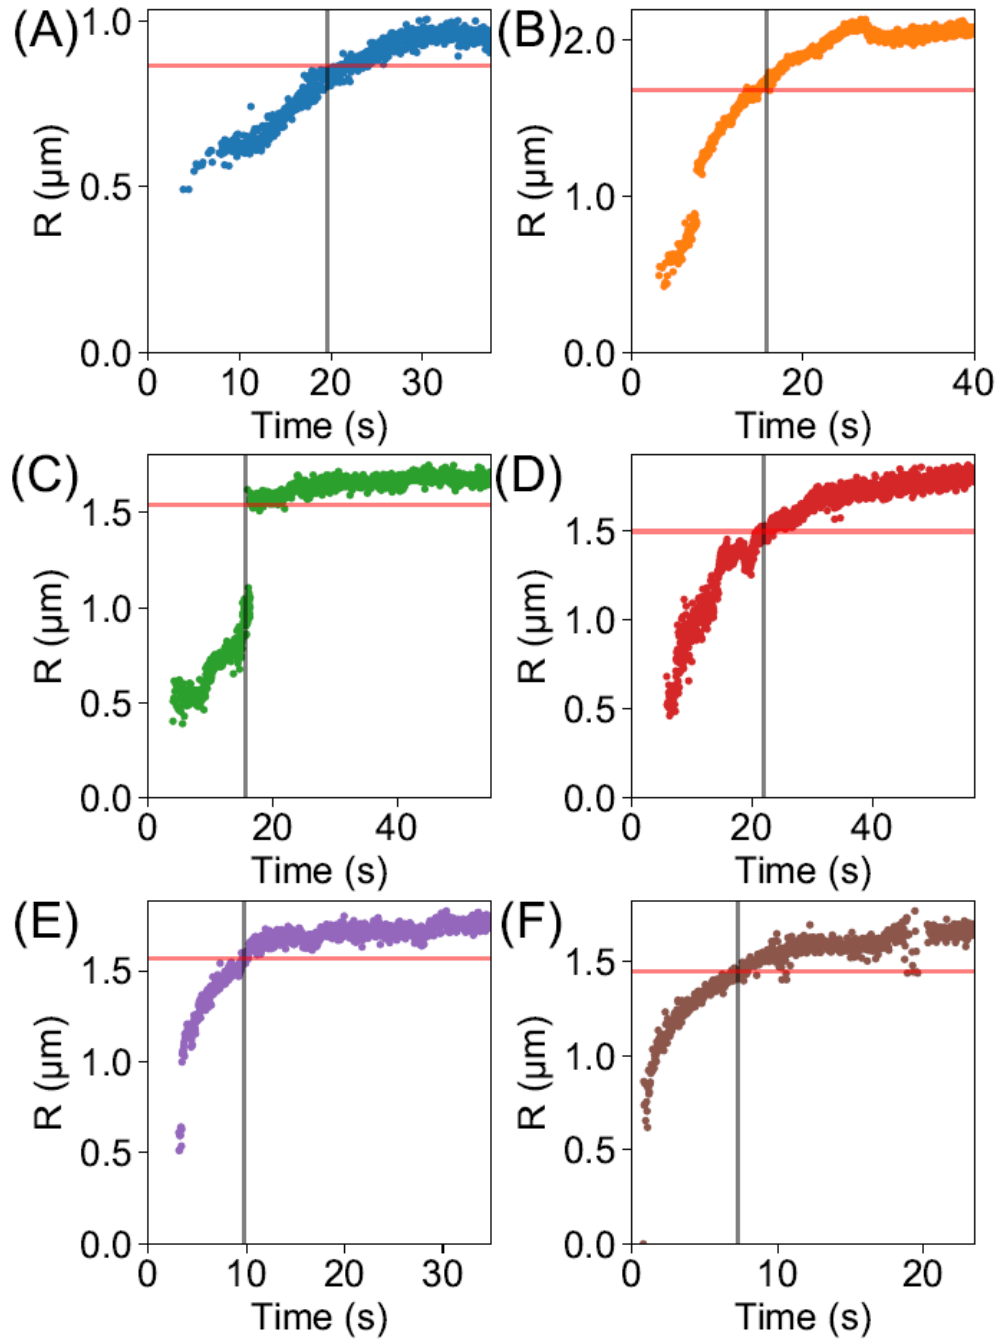

**Figure S1.** Plot of droplet base radius vs time for representative growing droplets. The flow rates were (A) 25  $\mu\text{l}/\text{min}$  (blue), (B) 35  $\mu\text{l}/\text{min}$  (orange), (C) 50  $\mu\text{l}/\text{min}$  (green), (D) 75  $\mu\text{l}/\text{min}$  (red), (E) 100  $\mu\text{l}/\text{min}$  (purple), (F) 150  $\mu\text{l}/\text{min}$  (brown).  $0.9R_{\text{max}}$  and the time taken to reach  $0.9R_{\text{max}}$  are shown by the red and black lines, respectively.
